# Supplementary material
Source: PubMed Central journal article supplement (PMC7111284)
Supplement: mmc1.pdf [file mmc1.pdf]

A

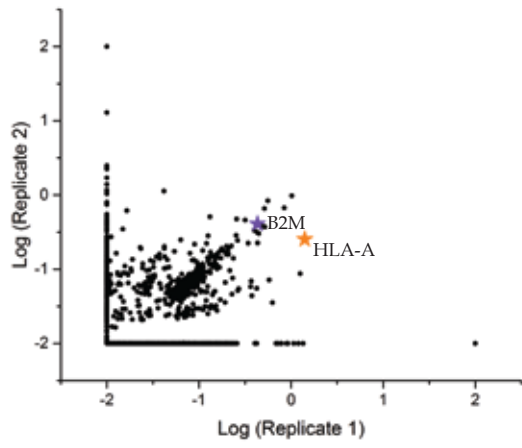

B  
+ IFN $\gamma$

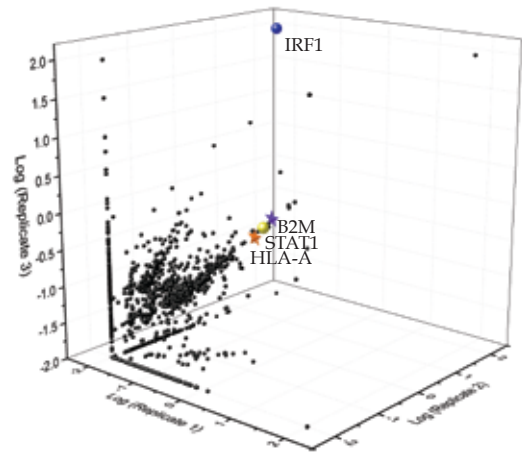

C

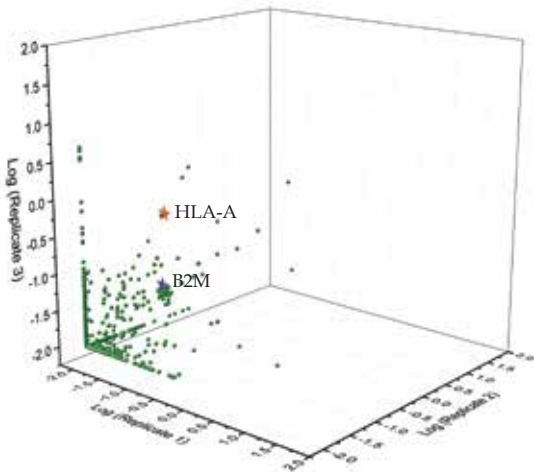

D  
+ IFN $\gamma$

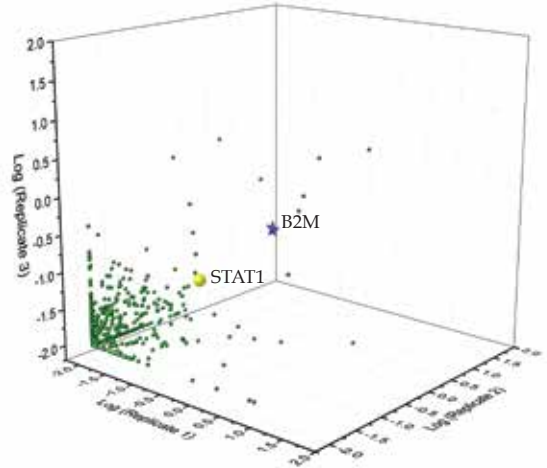

E

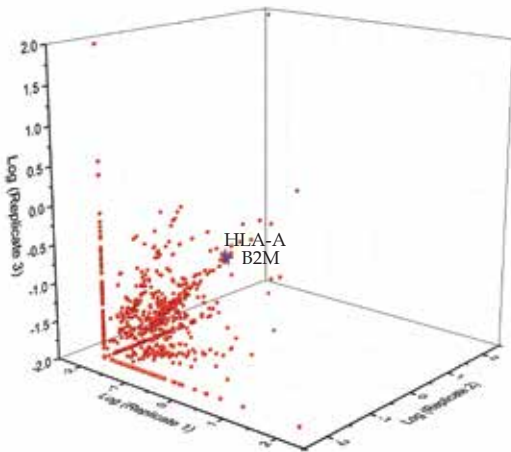

F  
+ IFN $\gamma$

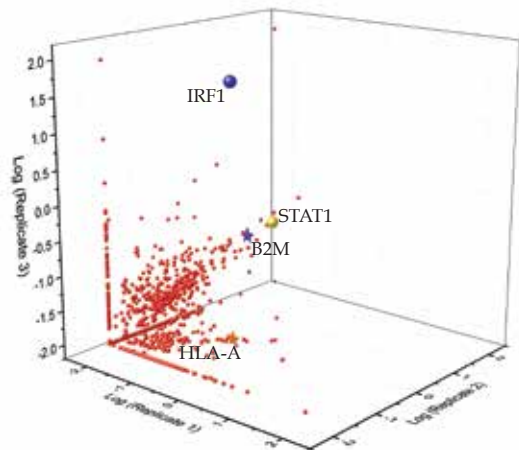

G

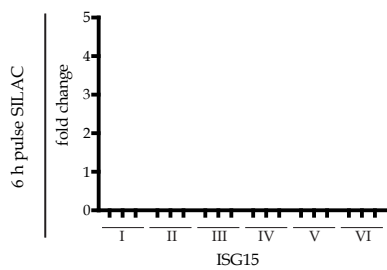

H

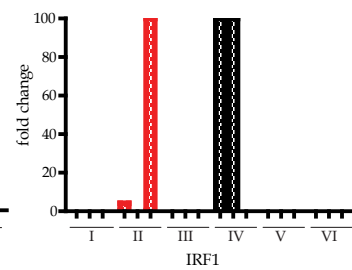

I

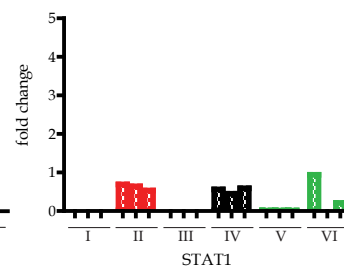

J

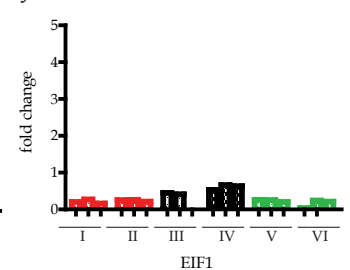

K

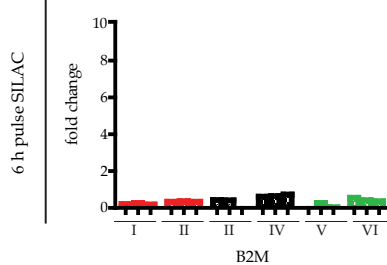

L

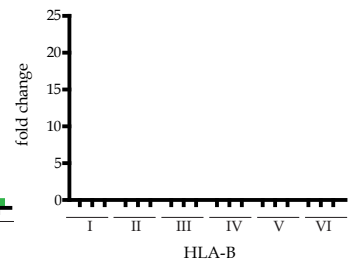

- *IFITM1/IFITM3* null I
- *IFITM1/IFITM3* null + IFN $\gamma$  II
- wt-SiHa III
- wt-SiHa + IFN $\gamma$  IV
- *IFITM1* null V
- *IFITM1* null + IFN $\gamma$  VI
