# Supplementary material
Source: PubMed Central journal article supplement (PMC7111284)
Supplement: mmc2.pdf [file mmc2.pdf]

wt-SiHa  
wt-SiHa + IFN $\gamma$

*IFITM1/IFITM3 null*  
*IFITM1/IFITM3 null + IFN $\gamma$*

HLA-A

|                   | 10                | 20                | 30                | 40                | 50                |
|-------------------|-------------------|-------------------|-------------------|-------------------|-------------------|
| MAVMAPRTL         | LLL               | SGALALT           | QTWAGSHSMR        | <u>YFSTSVSRPG</u> | <u>RGEPRFIAVG</u> |
| 60                | 70                | 80                | 90                | 100               |                   |
| <u>YVDDTQFVRF</u> | DSDAASQRME        | PRAPWIEQEG        | PEYWDEETGK        | VKAHSQTDRE        |                   |
| 110               | 120               | 130               | 140               | 150               |                   |
| NLRALRYYN         | QSEAGSHTLQ        | MMFGCDVGS         | GRFLRGYHQY        | AYDGKDYIAL        |                   |
| 160               | 170               | 180               | 190               | 200               |                   |
| KEDLRSWTAA        | <u>DMAAQITKRK</u> | <u>WEAAHVAEQQ</u> | <u>RAYLEGTCVD</u> | <u>GLRRYLENGK</u> |                   |
| *210              | 220               | *230              | 240               | 250               |                   |
| <u>ETLQRTDPPK</u> | <u>THMTHHPISD</u> | <u>HEATLRCWAL</u> | GFYPAEITLT        | WQRDGEDQTQ        |                   |
| 260               | *270              | 280               | 290               | 300               |                   |
| DTELVETRPA        | GDGTFQKWAA        | <u>VVPSGEEQR</u>  | <u>YTCHVQHEGL</u> | <u>PKPLTLRWEP</u> |                   |
| 310               | 320               | 330               | 340               | 350               |                   |
| SSQPTVPIVG        | IIAGLVLLGA        | VITGAVVAAV        | MWRRNSSDRK        | GGSYSQAASS        |                   |
| 360               |                   |                   |                   |                   |                   |
| DSAQGSVSL         | TACKV             |                   |                   |                   |                   |

HLA-B

|                   | 10                | 20                | 30                | 40                | 50 |
|-------------------|-------------------|-------------------|-------------------|-------------------|----|
| MRVTAPRTLL        | LLLWGAVALT        | ETWAGSHSMR        | <u>YFHTSVSRPG</u> | <u>RGEPRFITVG</u> |    |
| 60                | 70                | 80                | *90               | *100              |    |
| <u>YVDDTLFVRF</u> | DSDATSPRKE        | PRAPWIEQEG        | PEYWDRETQI        | SKTNTQTYRE        |    |
| 110               | 120               | 130               | 140               | 150               |    |
| SLRNLRGYYN        | QSEAGSHTLQ        | SMYGCDVGP         | GRLLRGHNQY        | AYDGKDYIAL        |    |
| 160               | 170               | 180               | 190               | 200               |    |
| NEDLRSWTAA        | <u>DTAAQITQRK</u> | <u>WEAARVAEQL</u> | <u>RAYLEGECVE</u> | <u>WLRRYLENGK</u> |    |
| 210               | 220               | 230               | *240              | 250               |    |
| <u>ETLQRADPPK</u> | <u>THVTHHPISD</u> | <u>HEATLRCWAL</u> | GFYPAEITLT        | WQRDGEDQTQ        |    |
| 260               | *270              | 280               | 290               | 300               |    |
| DTELVETRPA        | GDRTFQKWAA        | <u>VVPSGEEQR</u>  | <u>YTCHVQHEGL</u> | <u>PKPLTLRWEP</u> |    |
| 310               | 320               | 330               | 340               | 350               |    |
| SSQSTVPIVG        | IVAGLAVLAV        | VVIGAVVAAV        | MCRRKSSGGK        | GGSYSQAACS        |    |
| 360               |                   |                   |                   |                   |    |
| DSAQGSVSL         | TA                |                   |                   |                   |    |

HLA-C

|                   | 10                | 20                | 30                | 40                | 50                |
|-------------------|-------------------|-------------------|-------------------|-------------------|-------------------|
| MRVMAPRTLI        | LLL               | SGALALT           | ETWACSHSMR        | <u>YFSTSVSRPG</u> | <u>RGEPRFIAVG</u> |
| 60                | 70                | 80                | 90                | 100               |                   |
| <u>YVDDTQFVRF</u> | DSDAASPRGE        | PRAPWVEQEG        | PEYWDRETQK        | YKRQAQTDRE        |                   |
| 110               | 120               | 130               | 140               | 150               |                   |
| SLRNLRGYYN        | QSEAGSHTLQ        | WMFGCDLGP         | GRLLRGYDQS        | AYDGKDYIAL        |                   |
| 160               | 170               | 180               | 190               | 200               |                   |
| NEDLRSWTAA        | <u>DTAAQITQRK</u> | <u>WEAAREAEQR</u> | <u>RAYLEGTCVE</u> | <u>WLRRYLENGK</u> |                   |
| 210               | 220               | 230               | 240               | 250               |                   |
| <u>ETLQRAEHPK</u> | <u>THVTHHPVSD</u> | <u>HEATLRCWAL</u> | GFYPAEITLT        | WQWDGEDQTQ        |                   |
| 260               | *270              | 280               | 290               | 300               |                   |
| DTELVETRPA        | GDGTFQKWAA        | <u>VVPSGEEQR</u>  | <u>YTCHVQHEGL</u> | <u>PEPLTLRWEP</u> |                   |
| 310               | 320               | 330               | 340               | 350               |                   |
| SSQPTIPIVG        | IVAGLAVLAV        | LAVLGAVVAV        | VMCRKSSGG         | KGGSCSQAAS        |                   |
| 360               |                   |                   |                   |                   |                   |
| SNSAQGSDES        | LIACKA            |                   |                   |                   |                   |

Unique peptide for HLA\*

HLA-A

|                   | 10                | 20                | 30                | 40                | 50                |
|-------------------|-------------------|-------------------|-------------------|-------------------|-------------------|
| MAVMAPRTL         | LLL               | SGALALT           | QTWAGSHSMR        | YFSTSVSRPG        | <u>RGEPRFIAVG</u> |
| 60                | 70                | 80                | 90                | 100               |                   |
| <u>YVDDTQFVRF</u> | DSDAASQRME        | PRAPWIEQEG        | PEYWDEETGK        | VKAHSQTDRE        |                   |
| 110               | 120               | 130               | 140               | 150               |                   |
| NLRALRYYN         | QSEAGSHTLQ        | MMFGCDVGS         | GRFLRGYHQY        | AYDGKDYIAL        |                   |
| 160               | 170               | 180               | 190               | 200               |                   |
| KEDLRSWTAA        | <u>DMAAQITKRK</u> | <u>WEAAHVAEQQ</u> | <u>RAYLEGTCVD</u> | <u>GLRRYLENGK</u> |                   |
| *210              | 220               | 230               | *240              | 250               |                   |
| <u>ETLQRTDPPK</u> | <u>THMTHHPISD</u> | <u>HEATLRCWAL</u> | GFYPAEITLT        | WQRDGEDQTQ        |                   |
| 260               | 270               | 280               | 290               | 300               |                   |
| DTELVETRPA        | GDGTFQKWAA        | <u>VVPSGEEQR</u>  | <u>YTCHVQHEGL</u> | <u>PKPLTLRWEP</u> |                   |
| 310               | 320               | 330               | 340               | 350               |                   |
| SSQPTVPIVG        | IIAGLVLLGA        | VITGAVVAAV        | MWRRNSSDRK        | GGSYSQAASS        |                   |
| 360               |                   |                   |                   |                   |                   |
| DSAQGSVSL         | TACKV             |                   |                   |                   |                   |

HLA-B

|                   | 10                | 20                | 30                | 40                | 50 |
|-------------------|-------------------|-------------------|-------------------|-------------------|----|
| MRVTAPRTLL        | LLLWGAVALT        | ETWAGSHSMR        | YFHTSVSRPG        | RGEPRFITVG        |    |
| 60                | 70                | 80                | 90                | 100               |    |
| <u>YVDDTLFVRF</u> | DSDATSPRKE        | PRAPWIEQEG        | PEYWDRETQI        | SKTNTQTYRE        |    |
| 110               | 120               | 130               | 140               | 150               |    |
| SLRNLRGYYN        | QSEAGSHTLQ        | SMYGCDVGP         | GRLLRGHNQY        | AYDGKDYIAL        |    |
| 160               | 170               | 180               | 190               | 200               |    |
| NEDLRSWTAA        | <u>DTAAQITQRK</u> | <u>WEAARVAEQL</u> | <u>RAYLEGECVE</u> | <u>WLRRYLENGK</u> |    |
| 210               | 220               | 230               | 240               | 250               |    |
| <u>ETLQRADPPK</u> | <u>THVTHHPISD</u> | <u>HEATLRCWAL</u> | GFYPAEITLT        | WQRDGEDQTQ        |    |
| 260               | 270               | 280               | 290               | 300               |    |
| DTELVETRPA        | GDRTFQKWAA        | <u>VVPSGEEQR</u>  | <u>YTCHVQHEGL</u> | <u>PKPLTLRWEP</u> |    |
| 310               | 320               | 330               | 340               | 350               |    |
| SSQSTVPIVG        | IVAGLAVLAV        | VVIGAVVAAV        | MCRRKSSGGK        | GGSYSQAACS        |    |
| 360               |                   |                   |                   |                   |    |
| DSAQGSVSL         | TA                |                   |                   |                   |    |

HLA-C

|                   | 10                | 20                | 30                | 40                | 50         |
|-------------------|-------------------|-------------------|-------------------|-------------------|------------|
| MRVMAPRTLI        | LLL               | SGALALT           | ETWACSHSMR        | YFSTSVSRPG        | RGEPRFIAVG |
| 60                | 70                | 80                | 90                | 100               |            |
| <u>YVDDTQFVRF</u> | DSDAASPRGE        | PRAPWVEQEG        | PEYWDRETQK        | YKRQAQTDRE        |            |
| 110               | 120               | 130               | 140               | 150               |            |
| SLRNLRGYYN        | QSEAGSHTLQ        | WMFGCDLGP         | GRLLRGYDQS        | AYDGKDYIAL        |            |
| 160               | 170               | 180               | 190               | 200               |            |
| NEDLRSWTAA        | <u>DTAAQITQRK</u> | <u>WEAAREAEQR</u> | <u>RAYLEGTCVE</u> | <u>WLRRYLENGK</u> |            |
| 210               | 220               | 230               | 240               | 250               |            |
| <u>ETLQRAEHPK</u> | <u>THVTHHPVSD</u> | <u>HEATLRCWAL</u> | GFYPAEITLT        | WQWDGEDQTQ        |            |
| 260               | 270               | 280               | 290               | 300               |            |
| DTELVETRPA        | GDGTFQKWAA        | <u>VVPSGEEQR</u>  | <u>YTCHVQHEGL</u> | <u>PEPLTLRWEP</u> |            |
| 310               | 320               | 330               | 340               | 350               |            |
| SSQPTIPIVG        | IVAGLAVLAV        | LAVLGAVVAV        | VMCRKSSGG         | KGGSCSQAAS        |            |
| 360               |                   |                   |                   |                   |            |
| SNSAQGSDES        | LIACKA            |                   |                   |                   |            |

Unique peptide for HLA\*

## IFITM1 null

## IFITM1 null + IFN $\gamma$

### HLA-A

| 10                     | 20                     | 30                | 40                | 50                |
|------------------------|------------------------|-------------------|-------------------|-------------------|
| MAVMAPRTL              | LLLSGALALT             | QTWAGSHSMR        | YFSTSVSRPG        | RGEPRFIAVG        |
| 60                     | 70                     | 80                | 90                | 100               |
| <u>YVDDTQFVRF</u>      | DSDAASQRME             | PRAPWIEQEG        | PEYWDEETGK        | VKAHSQTDRE        |
| 110                    | 120                    | 130               | 140               | 150               |
| NLRIALRYYN             | QSEAGSHTLQ             | MMFGCDVGS         | GRFLRGYHQY        | AYDGKDYIAL        |
| 160                    | 170                    | 180               | 190               | 200               |
| KEDLRSWTAA             | DMAAQITKRK             | <u>WEAAHVAEQQ</u> | <u>RAYLEGTCVD</u> | <u>GLRRYLENGK</u> |
| 210                    | 220                    | 230               | * 240             | 250               |
| ETLQRTDPPK             | THMTHHPISD             | HEATLRCWAL        | GFYPAEITLT        | WQRDGEDQTQ        |
| 260                    | 270                    | 280               | 290               | 300               |
| DTELVETRPA             | GDGTFQK <del>WAA</del> | <u>VVVPSGEEQR</u> | YTCHVQHEGL        | PKPLTLRWEP        |
| 310                    | 320                    | 330               | 340               | 350               |
| SSQPTVPIVG             | IIAGLVLLGA             | VITGAVVAAV        | MWRRNSSDRK        | GGSYSQAASS        |
| 360                    |                        |                   |                   |                   |
| DSAQGS <del>DVSL</del> | TACKV                  |                   |                   |                   |

### HLA-B

| 10                     | 20                     | 30                     | 40                      | 50         |
|------------------------|------------------------|------------------------|-------------------------|------------|
| MRVTAPRTLL             | LLLWGAVALT             | ETWAGSHSMR             | YFHTSVSRPG              | RGEPRFITVG |
| 60                     | 70                     | 80                     | 90                      | 100        |
| YVDDTLFVRF             | DSDATSPRKE             | PRAPWIEQEG             | PEYWDRETQI              | SKTNTQTYRE |
| 110                    | 120                    | 130                    | 140                     | 150        |
| SLRNLRGYYN             | QSEAGSHTLQ             | SMYGC <del>DV</del> GP | GRLLRGHNQY              | AYDGKDYIAL |
| 160                    | 170                    | 180                    | 190                     | 200        |
| NEDLRSWTAA             | DTAAQITQRK             | WEAARVAEQL             | RAYLEGE <del>CV</del> E | WLRRYLENGK |
| 210                    | 220                    | 230                    | 240                     | 250        |
| ETLQRADPPK             | THVTHHPISD             | HEATLRCWAL             | GFYPAEITLT              | WQRDGEDQTQ |
| 260                    | 270                    | 280                    | 290                     | 300        |
| DTELVETRPA             | GDRTFQK <del>WAA</del> | <u>VVVPSGEEQR</u>      | YTCHVQHEGL              | PKPLTLRWEP |
| 310                    | 320                    | 330                    | 340                     | 350        |
| SSQSTVPIVG             | IVAGLAVLAV             | VVIGAVVAAV             | MCRRKSSGGK              | GGSYSQAACS |
| 360                    |                        |                        |                         |            |
| DSAQGS <del>DVSL</del> | TA                     |                        |                         |            |

### HLA-C

| 10         | 20                     | 30                | 40         | 50         |
|------------|------------------------|-------------------|------------|------------|
| MRVMAPRTLI | LLLSGALALT             | ETWACSHSMR        | YFSTSVSRPG | RGEPRFIAVG |
| 60         | 70                     | 80                | 90         | 100        |
| YVDDTQFVRF | DSDAASPRGE             | PRAPWVEQEG        | PEYWDRETQK | YKRQAQTDRV |
| 110        | 120                    | 130               | 140        | 150        |
| SLRNLRGYYN | QSEAGSHTLQ             | WMFGCDLGP         | GRLLRGYDQS | AYDGKDYIAL |
| 160        | 170                    | 180               | 190        | 200        |
| NEDLRSWTAA | DTAAQITQRK             | WEAAREAEQR        | RAYLEGTCVE | WLRRYLENGK |
| 210        | 220                    | 230               | 240        | 250        |
| ETLQRAEHPK | THVTHHPVSD             | HEATLRCWAL        | GFYPAEITLT | WQWDGEDQTQ |
| 260        | 270                    | 280               | 290        | 300        |
| DTELVETRPA | GDGTFQK <del>WAA</del> | <u>VVVPSGEEQR</u> | YTCHVQHEGL | PEPLTLRWEP |
| 310        | 320                    | 330               | 340        | 350        |
| SSQPTIPIVG | IVAGLAVLAV             | LAVLGAVVAV        | VMCRKSSGG  | KGGSCSQAAS |
| 360        |                        |                   |            |            |
| SNSAQGSDES | LIACKA                 |                   |            |            |

Unique peptide for HLA\*
