# Supplementary material
Source: PubMed Central journal article supplement (PMC7111284)
Supplement: mmc3.pdf [file mmc3.pdf]

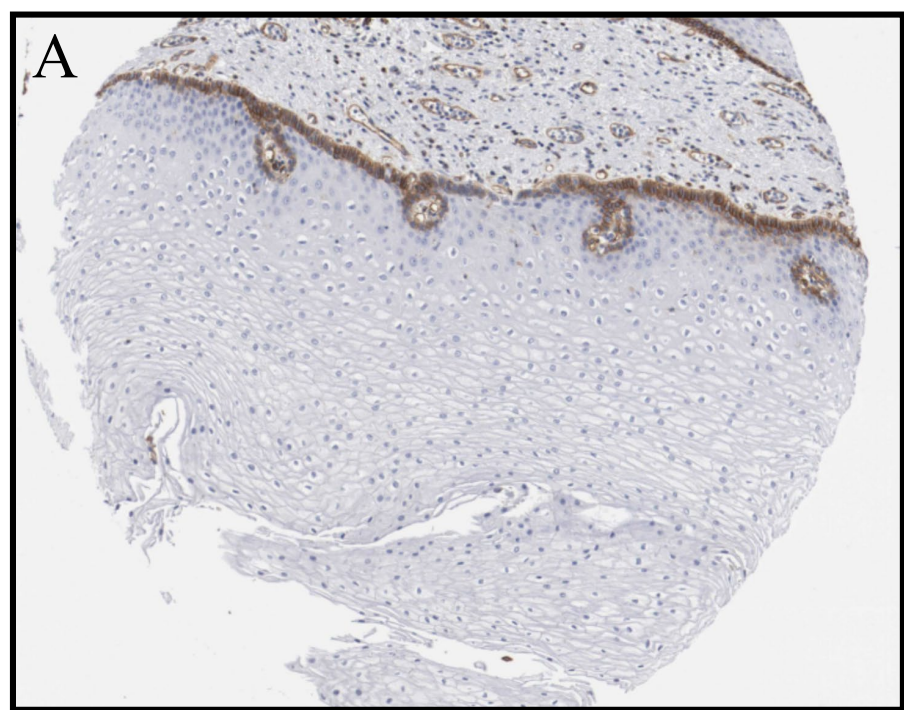

IFITM1 positive expression in the basal squamous layer of the esophagus

<https://www.proteinatlas.org/ENSG00000185885-IFITM1/tissue/esophagus#>

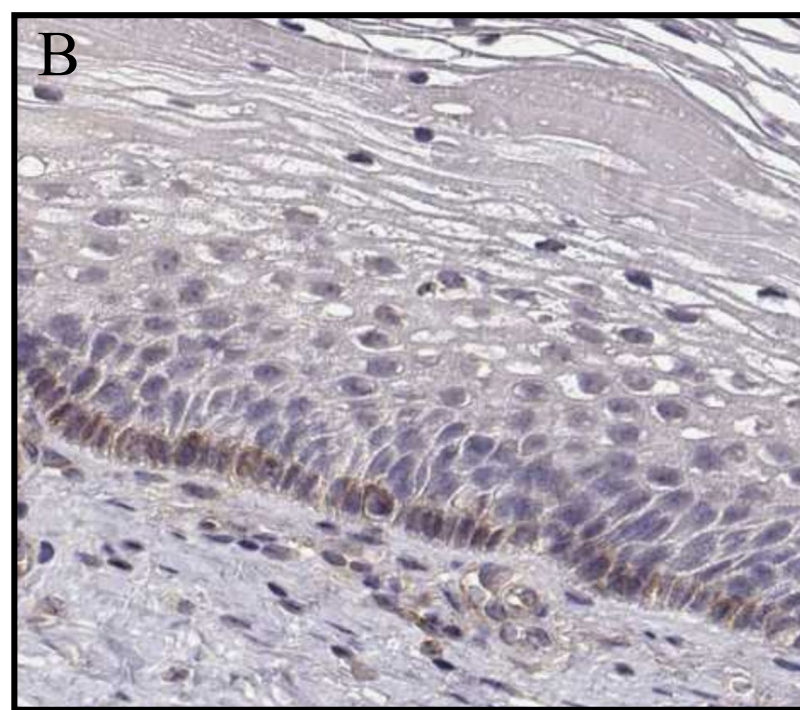

IFITM1 positive expression in the basal squamous layer of the cervix

<https://www.proteinatlas.org/ENSG00000185885-IFITM1/tissue/cervix%2C+uterine#img>

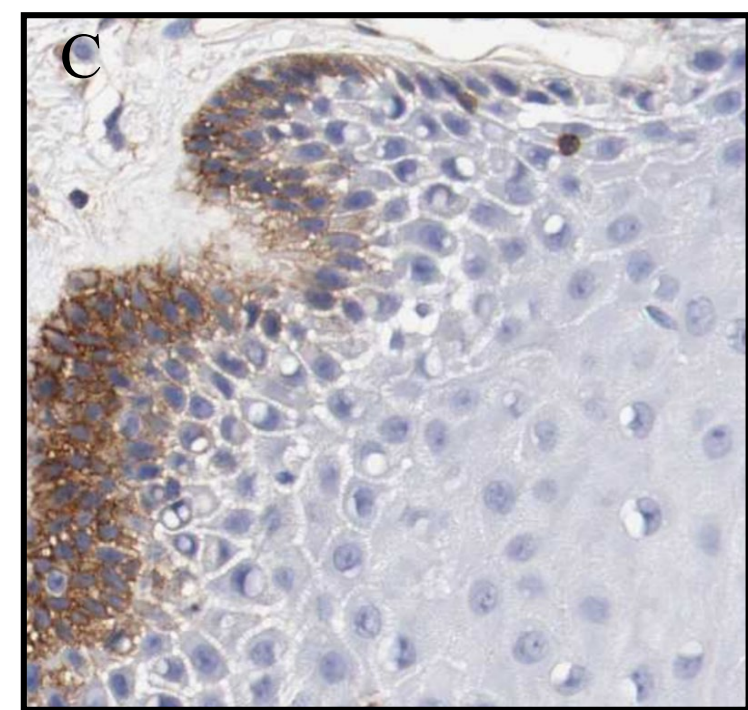

IFITM1 positive expression in the basal squamous layer of the oral cavity

<https://www.proteinatlas.org/ENSG00000185885-IFITM1/tissue/oral+mucosa#img>
